# Supplementary material for: Sleep, Prospective Memory, and Immune Status among People Living with HIV
Source: PubMed Central journal article supplement (PMC7826879; doi:10.3390/ijerph18020438), 2021-01-08
Supplement: ijerph-18-00438-s001.pdf [file ijerph-18-00438-s001.pdf]

## Supplementary Material:

**Table S1.** Cross-reference table between the actigraphy subgroup and the whole PLWH cohort explored with self-reported questionnaires. Significant differences are in bold type.

|                                                                       | Missing values | Total<br>(n=640) | Actigraphy<br>(n=96) | No actigraphy<br>(n=543) | P                |
|-----------------------------------------------------------------------|----------------|------------------|----------------------|--------------------------|------------------|
| Age median (IQR)                                                      | 0              | 48 (40-55)       | 48 (40-55)           | 47 (39-55)               | 0.67             |
| Men n (%)                                                             | 1              | 463 (72)         | 70 (73)              | 393 (72)                 | 0.91             |
| <b>Body Mass Index</b> n (%)                                          |                |                  |                      |                          |                  |
| Underweight (< 18)                                                    |                | 67 (11)          | 8 (8)                | 59 (11)                  |                  |
| Normal (18–25)                                                        | 0              | 354 (55)         | 45 (46)              | 309 (57)                 | <b>0.049</b>     |
| Overweight (25–30)                                                    |                | 165 (26)         | 36 (37)              | 129 (24)                 |                  |
| Obese (> 30)                                                          |                | 54 (8)           | 8 (8)                | 46 (8)                   |                  |
| <b>Professional activity</b> n(%)                                     | 12             | 428 (68)         | 61 (64)              | 367 (69)                 | 0.29             |
| Years since HIV diagnosis median (IQR)                                | 1              | 15 (7-22)        | 16                   | 14 (8-22)                | 0.75             |
| <b>History of AIDS-defining condition</b> n (%)                       | 8              | 114 (18)         | 16 (17)              | 98 (18)                  | 0.67             |
| <b>Current treatment</b> n (%)                                        |                |                  |                      |                          |                  |
| 2 NRT1+1 NNRTI                                                        |                | 241 (38)         | 31 (32)              | 210 (39)                 |                  |
| 2 NRT1+1 protease inhibitor                                           | 0              | 152 (24)         | 30 (31)              | 123 (23)                 | 0.20             |
| 2 NRT1+1 integrase inhibitor                                          |                | 63 (10)          | 12 (12)              | 51 (9)                   |                  |
| Other                                                                 |                | 183 (29)         | 24 (25)              | 159 (29)                 |                  |
| <b>Viral load &lt;20 copies/ml</b><br>n (%)                           | 8              | 500 (79)         | 81 (84)              | 419 (78)                 | 0.17             |
| <b>CD4 cell count nadir (cells/mm3)</b> median (IQR)                  | 17             | 252 (137-360)    | 253 (146-383)        | 252 (137-356)            | 0.83             |
| <b>CD4 cell count (cells/mm3)</b><br>median (IQR)                     |                | 596 (450-805)    | 568 (454-755)        | 696.5 (450-814)          |                  |
| ≥ 750 n (%)                                                           |                | 193 (30)         | 25 (26)              | 168 (31)                 |                  |
| 500-749 n (%)                                                         | 1              | 232 (36)         | 38 (39)              | 194 (36)                 | 0.46             |
| 350- 499 n (%)                                                        |                | 138 (22)         | 25 (26)              | 113 (21)                 |                  |
| < 349 n (%)                                                           |                | 76 (12)          | 9 (9)                | 67 (12)                  |                  |
| CD4 < 200 n (%)                                                       |                | 15 (2)           | 3 (3)                | 12 (2)                   |                  |
| <b>CD4/CD8 ratio ≥ 1</b> n (%)                                        | 8              | 262 (41)         | 37 (39)              | 225 (42)                 | 0.53             |
| <b>PROQOL-HIV global<br/>(Life quality)</b> median (IQR)              | 181            | 77 (62-85)       | 78 (62-86)           | 77 (62-85)               | 0.80             |
| <b>SF-12</b> median (IQR)                                             |                |                  |                      |                          |                  |
| SF-12 physical component scale                                        | 76             | 53 (46-57)       | 52 (57-46)           | 54 (46-57)               | 0.53             |
| SF-12 mental component scale                                          |                | 45 (35-53)       | 44 (33-51)           | 45.5 (35-53)             | 0.30             |
| <b>Beck Depression inventory</b><br>n (%)                             |                |                  |                      |                          |                  |
| No depression                                                         |                | 302 (63)         | 48 (62)              | 254 (63)                 |                  |
| Minimal depression                                                    | 158            | 102 (21)         | 16 (21)              | 86 (21)                  | 0.90             |
| Moderate depression                                                   |                | 68 (14)          | 13 (17)              | 55 (14)                  |                  |
| Severe depression                                                     |                | 10 (2)           | 1 (1)                | 9 (2)                    |                  |
| <b>PSQI &gt;5 (poor sleep quality)</b><br>n (%)                       | 219            | 288 (68)         | 59 (87)              | 229 (65)                 | <b>&lt;0.001</b> |
| <b>High risk of obstructive sleep apnoea (Berlin score ≥ 2)</b> n (%) | 207            | 91 (21)          | 18 (25)              | 73 (20)                  | 0.36             |
| <b>Epworth sleepiness scale</b><br>n (%)                              |                |                  |                      |                          |                  |
| No sleepiness (0-10)                                                  | 71             | 339 (60)         | 51 (58)              | 288 (60)                 |                  |
| Sleepiness (11–15)                                                    |                | 189 (33)         | 27 (31)              | 162 (34)                 | 0.25             |
| Severe sleepiness (> 16)                                              |                | 41 (7)           | 10 (11)              | 31 (6)                   |                  |
| <b>Chronotype</b> n (%)                                               |                |                  |                      |                          |                  |
| Morning                                                               | 1              | 183 (29)         | 26 (27)              | 157 (29)                 | 0.87             |
| Evening                                                               |                | 206 (32)         | 31 (32)              | 175 (32)                 |                  |
| Intermediate                                                          |                | 250 (39)         | 40 (41)              | 210 (39)                 |                  |
| <b>Short Sleeper (&lt;6h)</b> n (%)                                   | 31             | 149 (24)         | 26 (29)              | 123 (24)                 | 0.45             |

|                                                               |    |                     |                      |                      |      |
|---------------------------------------------------------------|----|---------------------|----------------------|----------------------|------|
| <b>Typical Sleeper (6-8h) n (%)</b>                           |    | 285 (47)            | 37 (42)              | 248 (48)             |      |
| <b>Long sleeper (&gt;8h) n (%)</b>                            |    | 175 (29)            | 26 (29)              | 149 (29)             |      |
| <b>Total sleep time /night<br/>(week) median median (IQR)</b> | 31 | 7:00<br>(5:45-7:52) | 7 :15<br>(5:35-7:55) | 7:00<br>(5:50-7:51)  | 0.82 |
| <b>Total sleep time / 24h (week) median (IQR)</b>             | 31 | 7 :15 (6:00-8:09)   | 7 :20<br>(5:40-8:04) | 7 :15 (6:00-8:09)    | 0.48 |
| <b>Total sleep time /night<br/>(week-end) median (IQR)</b>    | 86 | 7:55<br>(6:30-8:50) | 7 :54<br>(6:15-8:44) | 7 :55<br>(6:30-8:50) | 0.48 |
| <b>Total sleep time / 24h<br/>(week-end) median (IQR)</b>     | 86 | 7:55<br>(6:30-8:50) | 7:54<br>(6:15-8:45)  | 7:55<br>(6:30-8:50)  | 0.46 |
| <b>Nap/ week (n) median (IQR)</b>                             | 1  | 0 (0-1) /1          | 0(0-1)               | 0 (0-2)              | 0.11 |

**Table S2.** Clinical characteristics of persons living with HIV (PLWH) included in the actigraphy study.

|                                                                 | <b>PLWH<br/>(n=96)</b> |
|-----------------------------------------------------------------|------------------------|
| <b>Years since HIV diagnosis<br/>median (IQR)</b>               | 16 (6-22)              |
| <b>History of AIDS-defining condition n (%)</b>                 | 16 (17)                |
| <b>Anti-retroviral therapy<br/>n (%)</b>                        | 76 (78)                |
| <b>Anti-retroviral therapy duration<br/>Year (median (IQR))</b> | 10 (3-17)              |
| <b>Current treatment n (%)</b>                                  |                        |
| 2 NRT1+1 NNRTI                                                  | 31 (32)                |
| 2 NRT1+1 protease inhibitor                                     | 30 (31)                |
| 2 NRT1+ 1 integrase inhibitor                                   | 12 (12)                |
| Other                                                           | 24 (25)                |
| <b>Viral load &lt;20 copies/ml<br/>n (%)</b>                    | 81 (84)                |
| <b>CD4 cell count nadir (cells/mm3)<br/>Median (IQR)</b>        | 253 (146-383)          |
| <b>CD4 cell count (cells/mm3)<br/>median (IQR)</b>              | 568 (454-755)          |
| ≥ 750 n (%)                                                     | 25 (26)                |
| 500-749 n (%)                                                   | 38 (39)                |
| 350- 499 n (%)                                                  | 25 (26)                |
| < 349 n (%)                                                     | 9 (9)                  |
| < 200 n (%)                                                     | 3 (3)                  |
| <b>CD4/CD8 ratio ≥ 1<br/>n (%)</b>                              | 37 (39)                |

*NRTI* nucleoside reverse transcriptase inhibitor, *NNRTI* non-nucleoside reverse transcriptase inhibitor.
